# Supplementary material for: Cashmere-derived keratin for device manufacturing on the micro- and nanoscale
Source: Royal Society of Chemistry journal article supplement (doi:10.1039/c5tc00056d), 2015-01-01
Supplement: c5tc00056d1.pdf [file c5tc00056d1.pdf]

## Supporting Information

# **Cashmere-derived keratin for device manufacturing on the micro- and nanoscale**

*Benedetto Marelli and Fiorenzo G. Omenetto\**

B. Marelli and F. G. Omenetto\*  
Department of Biomedical Engineering  
Tufts University  
4 Colby St., Medford, MA, 02155, USA  
E-mail: [Fiorenzo.Omenetto@tufts.edu](mailto:Fiorenzo.Omenetto@tufts.edu)

F. G. Omenetto  
Department of Physics  
Tufts University  
4 Colby St., Medford, MA 02155

Keywords: keratin, optic, photonic, sensing

## **Experimental details**

*Keratin extraction:* Keratin is a family of proteins. Extraction of the proteins that form cashmere fibers yields not a single protein but several proteins, which falls under the name of keratins. For simplicity and clearness to non-technical experts, in the manuscripts we referred to this pool of proteins as keratin, considering it as a single entity. Keratin extraction was performed with a previously reported method <sup>1</sup>, with some modifications. In brief, raw, white cashmere wool (30g) was rinse in distilled water (6 liters, 30°C) for 30 minutes (three water changes every 10 minutes), blotted and dried under vacuum for 6 hours. Lipid extraction was then performed with 100% acetone for 24 hours to remove remaining unbound surface lipids. The fibers were then washed (3x) with distilled water (6 liters, 30°C) for 3 hours (three water changes every 45 min) and air-dried. Delipided cashmere fibers were then cut into short fibers, 3 mm long. A mixture of 7M urea (500 ml), 2-mercaptoethanol (50 ml) and 0.5M thiolurea (50 ml), was used to solubilized 30 g of cashmere at 50°C for 72h. The solution was then filtered through a stainless steel sieve (#200) and dialyzed in dialysis tubes (3,500 MW cut-off) against distilled water (8 liters) for 72 hours (changed every 6 hours). The so obtained keratin solution was then centrifuged twice (5°C, 9000 rpm, 20 min per cycle) to remove insoluble particles, resulting in a clear protein solution (0.7±0.3 wt%), which was then concentrated to 2 wt% through a centrifugal evaporator. The total extraction yield was 47±5%.

*Film Preparation and slow drying process:* Keratin films were fabricated by solvent casting keratin solution on PDMS molds. Slow drying process was achieved by controlling the relative humidity environment (RH=30-95%) during keratin solution solvent casting by using a custom made humidity chamber. Diffractive PDMS mold and PDMS-made multi-lens arrays were fabricated using optical diffraction gratings (Edmund Optics, 300-1200 lines/mm)

or optical cards (Digital Optics Corp., Tessera Technologies Inc.) as masters. After drying, films were let acclimated to RH=30% and then carefully lifted from the mold. Film thickness was controlled by varying either keratin concentration or solution volume used during casting.

*Inverse opal fabrication:* PMMA nanospheres ( $\varnothing=250$  nm) were used to fabricate an opal template (1% concentration dispersed in water, Phosphorex). The PMMA solution was deposited onto a silicon wafer, which was then heated on a hotplate at 90 °C to generate the PMMA opal by self-assembly induced by water evaporation. The keratin solution was then added to the PMMA opal and filled the air voids by capillary infiltration. The solution was set to dry in a film at room temperature and RH=95%. The so formed keratin film was soaked in acetone for 24 h to allow for detachment from the silicon wafer and removal of the PMMA nanospheres.

*Measurement of regenerated keratin molecular weight and purity:* Cashmere-derived keratin was diluted 1:1 with a solution of 2x Laemmli sample buffer, 4% SDS, 20% glycerol, 10% 2-mercaptoethanol and 0.125 M Tris-HCl. Keratins were then run in a vertical slab gel electrophoretic system at 200 V, 80 mA, and 25W. A solution of 0.1% Coomassie brilliant blue R-250 (Sigma), 10% acetic acid, and 40% methanol was then used to stain the keratin in the gel for 1 h. Excess of staining was then removed by rinsing the gel in deionized water overnight.

*Physical characterization:* Scanning electron microscopy (SEM) was used to investigate keratin film morphology and to determine surface patterning. Casted films were mounted on carbon tape and sputter coated with platinum-palladium. The films were then imaged using a scanning electron microscope (Supra55VP, Zeiss). Atomic force microscopy (AFM) was used to investigate surface morphology and to determine surface roughness of non-patterned and patterned keratin films. Micrographs of keratin films were acquired with a Digital Instrument Dimension 3100 (Veeco Instruments, Inc.) in tapping mode. Keratin film spectrum

in the visible wavelengths was measured with a USB2000 Miniature Fiber Optic Spectrometer. A Metricon waveguide instrument was used to evaluate refractive index of keratin films. The measured indices of refraction and film thicknesses are evaluated at a wavelength of  $\lambda = 633$  nm, as previously reported for silk fibroin.

*Spectroscopical characterization:* Attenuated Total Reflectance Fourier Transform Infrared (ATR-FTIR) spectroscopy of keratin films was performed with a Jasco FT/IR-6200 Spectrometer, equipped with a multiple reflection, horizontal MIRacle™ attachment (Ge crystal, from Pike Tech., Madison, WI). Each collected spectrum was obtained as an average of 128 scans with a wavenumber range of 4000-650  $\text{cm}^{-1}$  and a nominal resolution of 4  $\text{cm}^{-1}$ . To analyze keratin conformational changes as a function of slow drying processing, Amide I and Amide III peak absorptions were analyzed as previously reported <sup>2, 3</sup>. Micro-Raman spectroscopy was performed with a Jasco NRS-3000 spectrometer in the 2000-400  $\text{cm}^{-1}$  range using a 733 laser and a 100x objective. Each spectra was collected as an average of 20 scans (10s per scan) with a resolution of 1  $\text{cm}^{-1}$ . Cosmic rays removal, measurement of FWHM and of  $I_{850}/I_{830}$  ratio were performed with Jasco Spectra Analysis software. Ellman's reagent was used to determine the content of free thiol groups of cysteine residues in the cashmere-derived regenerated keratin solution and in assembled films <sup>4</sup>.

## References

1. A. Nakamura, M. Arimoto, K. Takeuchi and T. Fujii, *Biological and Pharmaceutical Bulletin*, 2002, 25, 569-572.
2. A. Vasconcelos, G. Freddi and A. Cavaco-Paulo, *Biomacromolecules*, 2008, 9, 1299-1305.
3. G. Freddi, G. Pessina and M. Tsukada, *International Journal of Biological Macromolecules*, 1999, 24, 251-263.
4. G. L. Ellman, *Archives of Biochemistry and Biophysics*, 1959, 82, 70-77.

**Table S1.** Reduced cysteine content (measured as free thiol group through Ellman’s reagent assay) in cashmere-derived regenerated keratin solution, in keratin films assembled at increasing relative humidity values, and in keratin films after acetone post-treatment

| Keratin material<br>[slow-drying relative humidity, %] | Free thiol group concentration<br>[mM] |
|--------------------------------------------------------|----------------------------------------|
| Keratin solution                                       | 0.976±0.231                            |
| Film [RH=50%]                                          | 0.061±0.018                            |
| Film [RH=75%]                                          | 0.143±0.041                            |
| Film [RH=95%]                                          | 0.579±0.074                            |
| Film [RH=95%] – Acetone post-treatment                 | 0.302±0.027                            |

Figure S1

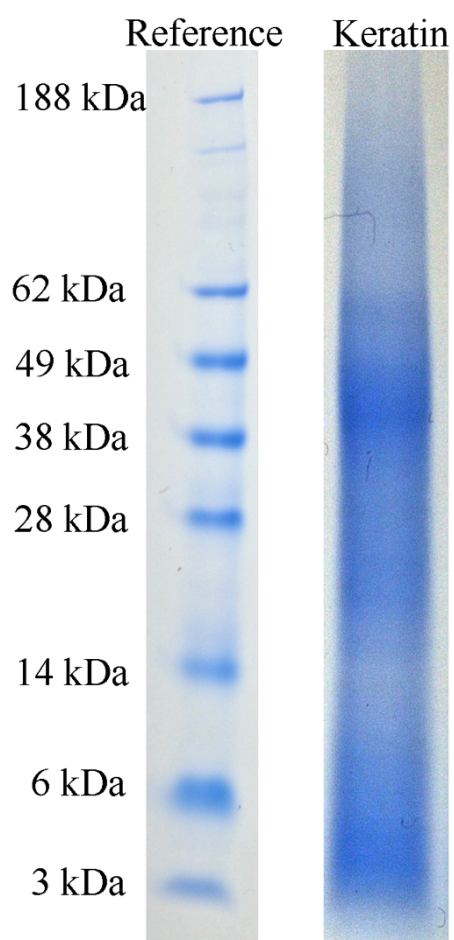

**Figure S1.** SDS-PAGE of standard protein molecular weight markers (left lane) and cashmere-extracted keratin (right lane).

Figure S2

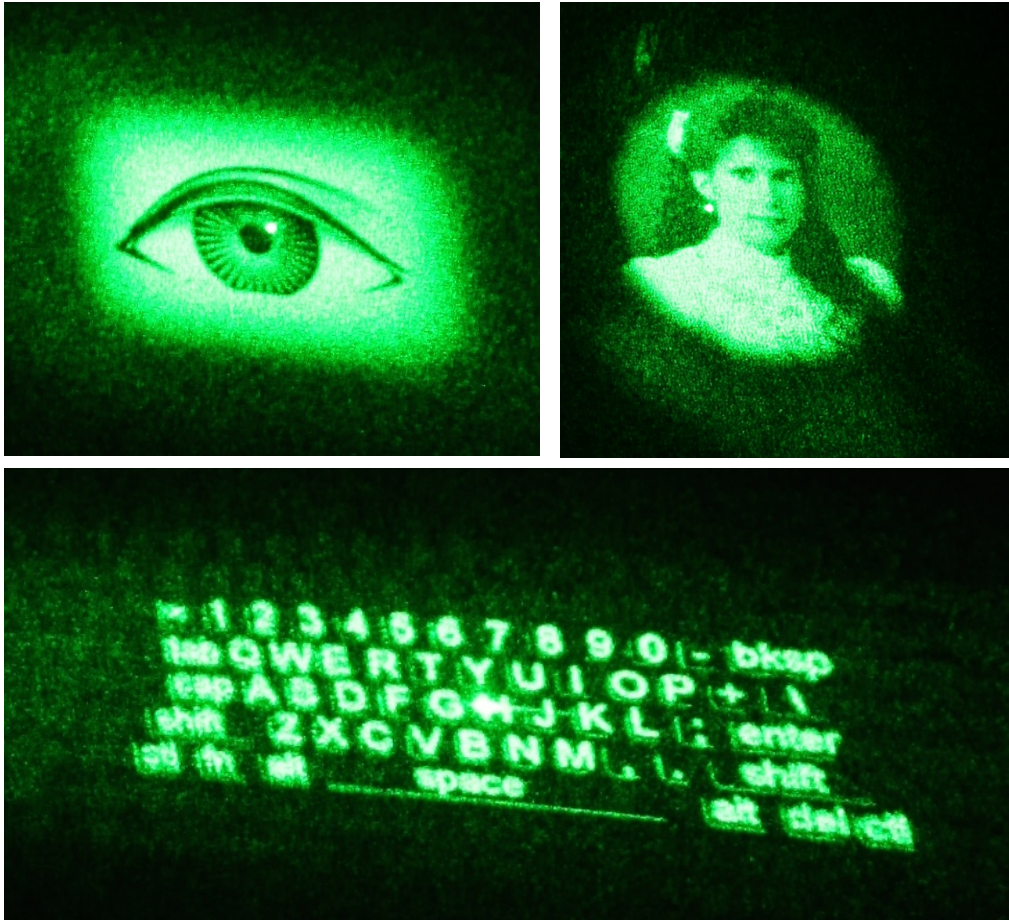

**Figure S2.** Photograph of projected patterns obtained from propagation of a green light laser source through keratin-made 2D diffractive phase masks. The images are taken at a distance of 10 cm from the keratin optical element. (Master from Digital Optics Inc., Tessera Corporation).
